1 **Title:** Intraoperative electrical stimulation of the human dorsal spinal cord reveals a map of arm and hand muscle  
2 responses

3 **Abbreviated title:** Stimulation map of the human cervical spinal cord

4 James R. McIntosh<sup>a, d</sup>, Evan. F. Joiner<sup>b</sup>, Jacob L. Goldberg<sup>d</sup>, Lynda M. Murray<sup>h, i</sup>, Bushra Yasin<sup>a, d</sup>, Anil Mendiratta<sup>c</sup>,  
5 Steven C. Karceski<sup>e</sup>, Earl Thuet<sup>f</sup>, Oleg Modik<sup>e</sup>, Evgeny Shelkov<sup>e</sup>, Joseph M. Lombardi<sup>a, f</sup>, Zeeshan M. Sardar<sup>a, f</sup>, Ronald  
6 A. Lehman<sup>a, f</sup>, Christopher Mandigo<sup>b, f</sup>, K. Daniel Riew<sup>a, d, f</sup>, Noam Y. Harel<sup>g, h, i</sup>, Michael S. Virk<sup>d, \*</sup>, Jason B. Carmel<sup>a, c, d, \*</sup>

7  
8 <sup>a</sup>Dept. of Orthopedic Surgery, <sup>b</sup>Dept. of Neurological Surgery, <sup>c</sup>Dept. of Neurology, Columbia University, 650 W.  
9 168th St, New York, NY, 10032, USA

10 <sup>d</sup>Dept. of Neurological Surgery, <sup>e</sup>Dept. of Neurology, Weill Cornell Medicine - New York Presbyterian, Och Spine,  
11 1300 York Ave, New York, NY 10065

12 <sup>f</sup>New York Presbyterian, The Och Spine Hospital, 5141 Broadway, New York, NY 10034

13 <sup>g</sup>Departments of Neurol., <sup>h</sup>Rehabil. and Human Performance, Icahn Sch. of Med. at Mount Sinai, One Gustave L. Levy  
14 Place, New York, NY 10029

15 <sup>i</sup>James J. Peters VA Med. Ctr., 130 West Kingsbridge Road, Bronx, NY 10468

16 \*J. B. Carmel and M. S. Virk should be considered joint senior authors.

17 Correspondence should be addressed to J. B. Carmel ([jason.carmel@columbia.edu](mailto:jason.carmel@columbia.edu)) or J. R. McIntosh  
18 ([j.mcintosh@columbia.edu](mailto:j.mcintosh@columbia.edu))

19 **Keywords:** Epidural; Electrical stimulation; Cervical; Spinal cord injury; Myelopathy; Motor evoked potentials.

20 **Abbreviations:** mJOA, Modified Japanese Orthopaedic Association; MEP, Motor Evoked Potential; TA, Tibialis  
21 Anterior; EDB, Extensor Digitorum Brevis; AH, Abductor Hallucis; AUC, Area Under the Curve; SCI, Spinal Cord  
22 Injury; SEM, Standard Error of the Mean.

### 23 Conflict of interest

24 Jason B. Carmel is a Founder and stock holder in BackStop Neural and a scientific advisor for SharperSense. Michael  
25 S. Virk has been a consultant and has received honorarium from Depuy Synthes, Globus Medical and BrainLab. Noam  
26 Y. Harel is a consultant for RubiconMD. K. Daniel Riew: Consulting: Happe Spine (Nonfinancial), Nuvasive; Royalties:  
27 Biomet; Speaking and/or Teaching Arrangements: Biomet, Medtronic (Travel Expense Reimbursement); Stock  
28 Ownership: Amedica, Axiomed, Benvenue, Expanding Orthopedics, Osprey, Paradigm Spine, Spinal Kinetics,  
29 Spineology, Vertiflex. The other authors have nothing to disclose.

### 30 Acknowledgements:

31 Sources of financial support: This study was funded by the National Institutes of Health (1R01NS124224); and the  
32 Travis Roy Foundation Boston, MA (Investigator Initiated).

33 We thank neurologists P. Kent, H. Choi, M. Bell (The Och Spine Hospital At New York Presbyterian Hospital) and  
34 intraoperative monitoring technologists N. Patel, Z. Moheet (Weill Cornell Medicine), Joe Elliott, Brian Demboski,  
35 Kelley Wichman, Susannah Storms, Meghan Mullaney, Evance Desriviere (The Och Spine Hospital At New York  
36 Presbyterian Hospital) for monitoring patient safety during the experiments, as well as help with running the  
37 experiments. We also thank S. Oh (Columbia University), E. Wong (Brainlab AG) and Brainlab AG for help with image  
38 processing and M. Vulapalli, C. Mykolajchuk, M. Michael (Weill Cornell Medicine) for help in administrative matters.

39

40 **New and noteworthy**

41 A map of muscle responses to cervical epidural stimulation during clinically indicated surgery revealed strongest  
42 activation when stimulating laterally compared to midline, and differences to be weaker than expected across different  
43 segments. In contrast, waveform shapes and latencies were most similar when stimulating midline and laterally  
44 indicating activation of overlapping circuitry. Thus, a map of the cervical spinal cord reveals organization and may help  
45 guide stimulation to activate arm and hand muscles strongly and selectively.

46

47 **Graphical abstract**

Intraoperative electrical stimulation of the human dorsal spinal cord reveals a map of arm and hand muscle responses

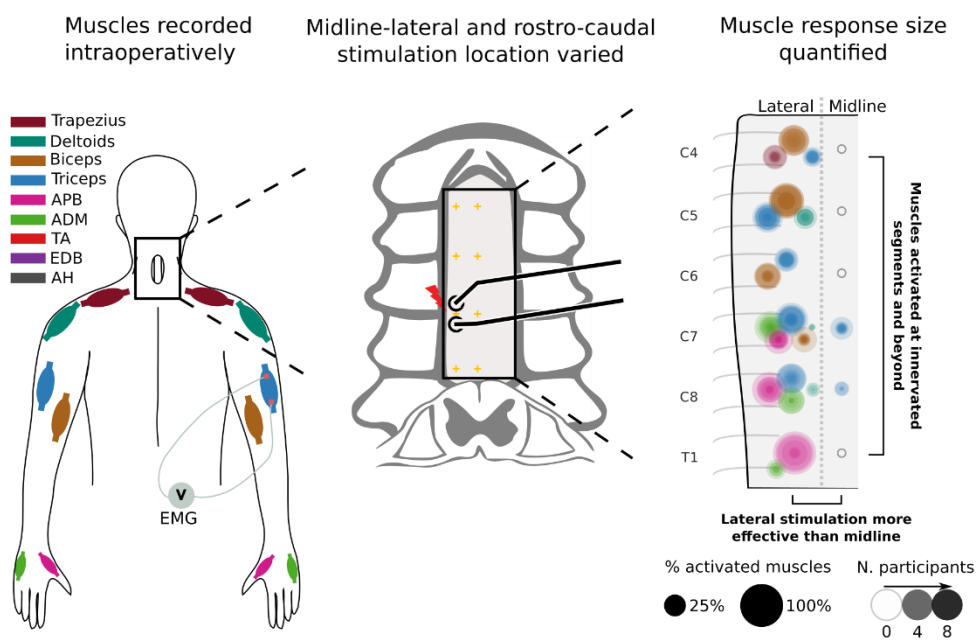

48

49

50 **Abstract**

51 While epidural stimulation of the lumbar spinal cord has emerged as a powerful modality for recovery of movement,  
52 how it should be targeted to the cervical spinal cord to activate arm and hand muscles is not well-understood, particularly  
53 in humans. We sought to map muscle responses to posterior epidural cervical spinal cord stimulation in humans. We  
54 hypothesized that lateral stimulation over the dorsal root entry zone would be most effective, and responses would be  
55 strongest in the muscles innervated by the stimulated segment. Twenty-five people undergoing clinically indicated  
56 cervical spine surgery were consented to map motor responses. During surgery, stimulation was performed in midline  
57 and lateral positions at multiple exposed segments; six arm and three leg muscles were recorded on each side of the  
58 body. Across all segments and muscles tested, lateral stimulation produced stronger muscle responses than midline  
59 despite similar latency and shape of responses. Muscles innervated at a cervical segment had the largest responses from  
60 stimulation at that segment, but responses were also observed in muscles innervated at other cervical segments and in  
61 leg muscles. The cervical responses were clustered in rostral (C4-C6) and caudal (C7-T1) cervical segments. Strong  
62 responses to lateral stimulation are likely due to the proximity of stimulation to afferent axons. Small changes in response  
63 sizes to stimulation of adjacent cervical segments argues for local circuit integration, and distant muscle responses  
64 suggest activation of long propriospinal connections. This map can help guide cervical stimulation to improve arm and  
65 hand function.

66

## 67 **1 Introduction**

68 Epidural stimulation has emerged as a way to modify spinal cord circuits for movement recovery (1–5). These studies  
69 largely targeted the lumbar spinal cord, with its relatively well-defined central pattern generator (6, 7). In contrast, the  
70 circuit-level logic of where and how to stimulate the cervical spinal cord is not as well known. Since hand function is  
71 the top priority of people with cervical spinal cord injury (SCI) (8, 9), interventions are under development to target the  
72 cervical spinal cord (10–15). Effective stimulation of the cervical spinal cord may be more difficult than for the  
73 lumbosacral spinal cord given its large behavioral repertoire and poorly understood intrinsic programs (16). The current  
74 study used electrical stimulation during clinically indicated cervical spine surgery to improve understanding of cervical  
75 spinal cord circuits.

76 Some of the insights learned from lumbar epidural stimulation apply to the cervical spinal cord. Stimulation of the dorsal  
77 spinal cord at low intensity evokes muscle responses via large-diameter afferents and not by direct activation of  
78 motoneurons (17, 18). Electrical stimulation of afferents activates motoneurons through circuits involved in reflexes  
79 (19, 20). This mechanism has been corroborated by mathematical modeling of current flow (21–23) as well as in  
80 inactivation studies (14). Consistent with this model, we have shown that stimulating near the dorsal root entry zone is  
81 more effective than stimulating at midline in the cervical spinal cord of rats (24).

82 Dorsal epidural stimulation of a cervical segment activates muscles innervated at that segment with spread to adjacent  
83 segments. In work performed mostly in monkeys, muscle responses to epidural stimulation of the cervical spinal cord  
84 (23, 25) broadly correspond to the distribution of motor pools throughout the cervical cord (26, 27). The spread of  
85 responses beyond the stimulated segment may be due to spread of afferents (28, 29) or variability in motoneuron to  
86 muscle connections (30). For example, with the exception of the separation between the biceps and triceps, Greiner et  
87 al. (23) observed a considerable overlap in the activated muscles at each cervical spinal segment in macaque monkeys.  
88 When stimulating dorsally in humans this breadth of activation of individual muscles across multiple segments is  
89 present; however, some additional divergence has also been found (31), with the most extreme observation being of leg

90 muscle activation to dorsal epidural cervical stimulation (32). Leg muscle activation has also been observed in  
91 transcutaneous dorsal cervical stimulation (33).

92 These data led us to hypothesize that epidural stimulation of each cervical segment would activate large diameter  
93 afferents, causing strongest contraction of muscles innervated at that segment when stimulating laterally near the dorsal  
94 root entry zone. The detailed predicted results are shown in Fig. 1b, with larger circles representing larger MEPs  
95 provoked by stimulation at that location in biceps (brown) or triceps (blue). Similar to our studies in rats (24), we  
96 predicted that lateral stimulation of the spinal cord would be more effective than midline stimulation. The strongest  
97 responses would be observed at the segment of innervation (e.g. C5 and C6 for biceps (34) and C7 for triceps) with  
98 spread from there to adjacent segments. Taken together, we expected that there would be a larger change in the size of  
99 motor evoked potentials when comparing midline to lateral stimulation within each segment than when comparing  
100 rostral-caudal cervical segments. Despite these differences, we expected that midline and lateral stimulation would  
101 activate similar circuits, and we tested this by comparing MEP waveform shape and onset latency. The results are  
102 expected to help target cervical epidural stimulation to activate or modulate arm and hand muscles.

## 103 **2 Materials and methods**

### 104 *2.1 Experimental design*

105 Among people undergoing clinically indicated spine surgery, epidural electrical stimulation of the exposed segments of  
106 the cervical spinal cord was performed, and motor evoked potentials (MEPs) from arm and leg muscles were recorded  
107 (Fig. 1A). Surgical time was not extended by the experimental procedure for longer than 15 minutes to limit the surgical  
108 and anesthetic risk of increased intraoperative time (35). To test whether lateral stimulation would be more effective  
109 than midline, stimulation at each of these sites was compared (Fig. 1B). To test whether stimulation at one cervical  
110 segment would produce the largest responses in muscles innervated at that segment, stimulation at multiple cervical  
111 roots was performed. To test whether circuits activated at midline and lateral stimulation are more similar to each other  
112 than circuits activated at different rostral-caudal segments, we compared MEP onset latencies and correlations in  
113 waveform shape. To test whether moving the stimulating electrodes in the midline-lateral direction would produce larger  
114 changes than in the rostro-caudal direction, the size of MEP change over change in distance was computed for each

115 direction (see Methods section "Comparison of responses at different cervical segments"). A representative experiment  
 116 is shown in Fig. 1C. The primary outcome was the size of the MEP, and the secondary outcomes were the threshold and  
 117 slope of the recruitment curve with increasing stimulus intensity, as well as the onset latency and shape of the resultant  
 118 MEPs.

119

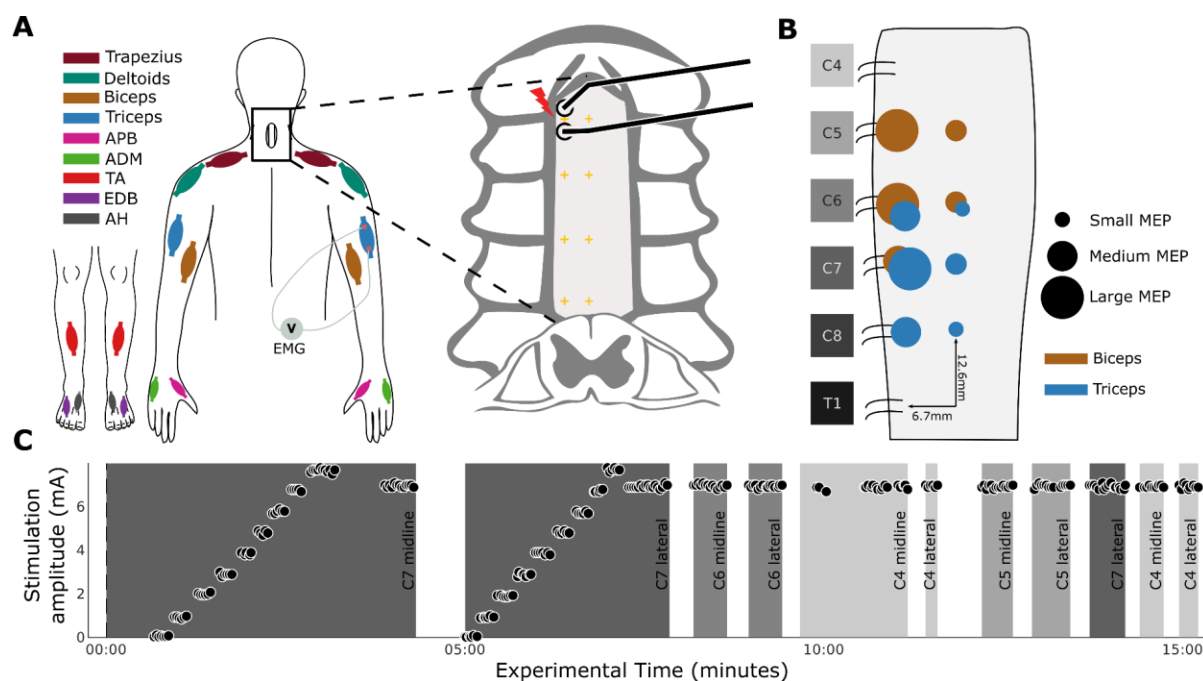

**Figure 1.** Epidural stimulation experiment during posterior cervical spine surgery. **(A)** Once the dura was exposed by laminectomy, a handheld or catheter electrode was used to stimulate at multiple segmental locations in either the lateral or midline position. Colors correspond to different recorded muscles (see legend). **(B)** Hypothesized responses to epidural stimulation of the cervical cord: 1) Lateral stimulation over the dorsal root entry zone was expected to be more effective than stimulation over the midline (large circles, representing high activation are lateral, while smaller circles are placed along the midline). 2) Muscle activation was expected to be relatively localized in the rostral-caudal direction; however, some spread of this activation was expected. **(C)** Example sequence of the 15 minute experiment. Initially, the electrode was placed along the midline, over the dura at a segment aligned with the expected location of the root entry (C7 midline for this experiment). The stimulation intensity was ramped up with two purposes: 1) in search of the threshold of a target muscle. 2) To gather threshold information for multiple muscles in a single sweep. Once the threshold was found stimulation was performed at 1.2× that value. The procedure was then repeated laterally to enable a midline-lateral comparison. Stimulation was performed at multiple segments at both midline and lateral locations.

120

## 121 2.2 Confirmation of electrode position over the dorsal root entry zone

122 When placed laterally, electrodes were positioned straddling the expected location of the dorsal root entry zone in a  
 123 rostral-caudal orientation as identified by bony and neural anatomical landmarks. Specifically, the exiting cervical nerve  
 124 was identified at each relevant level as it entered the neural foramen just caudal to the pedicle. The electrodes were then

125 placed at the site the dorsal root enters the lateral spinal cord. Electrode placement based on anatomical landmarks was  
126 subsequently confirmed to be over the dorsal root entry zone via image reconstruction and coregistration between  
127 preoperative MRI and intraoperative CT scans performed in one participant. Clinically indicated intraoperative-CT  
128 (Airo, Stryker Inc.) and pre-operative MRI (T2-weighted, Siemens) were gathered for this participant. During the course  
129 of the experiment, the location of the C7 root entry was inferred based on the bony landmarks of the spine. After placing  
130 the electrode at that site an intraoperative photograph was taken (Fig. 2A1). The location of the electrode was then  
131 translated to a location in the CT based on instrumentation inserted during surgery (Fig. 2A2). The CT and MRI images  
132 were then co-registered by performing a non-linear registration with the “Curvature Correction” software (Brainlab AG)  
133 to account for the different curvature of the spine in prone (operative) and supine (preoperative) participant positions  
134 (Fig. 2A3). The transformation generated in the registration was then also applied to the location of the electrode in the  
135 CT and shown in the MRI (Fig. 2A4).

136 Confirmation of electrode position was also made visually in an additional experimental condition where stimulation  
137 was applied at the T1 root entry, below the surface of the dura and at matched epidural locations (Fig. 2B).

### 138 *2.3 Participants*

139 Participants were adult patients with cervical spondylotic myelopathy, multilevel foraminal stenosis, or intradural tumor  
140 requiring surgical treatment (Table 1, Table S1). Patients were enrolled from the clinical practices of the spine surgeons  
141 participating in the study. The study protocol was reviewed and approved by the institutional review boards of the two  
142 study sites, Weill Cornell Medical Center and Columbia University Irving Medical Center (ClinicalTrials.gov number:  
143 NCT05163639, participants were recruited after registration). Patients with stimulation devices in the neck or chest (e.g.  
144 vagal nerve stimulation, cardiac patients with pacemakers) or head and neck implants were excluded. Informed consent  
145 for participation in the study was obtained prior to surgery for every participant. Participants underwent standard of care  
146 preoperative clinical assessments. The modified Japanese Orthopaedic Association (mJOA) scores were used to assess  
147 the severity of myelopathy. These experiments were powered with effect size based on comparisons of midline and  
148 lateral stimulation in the rat (24). Conservatively assuming a reduced effect size by 50% compared to the rat experiments  
149 (Cohen’s  $d = 0.97$  versus 1.94), the analysis indicated that to achieve 90% power using a Wilcoxon signed-rank test ( $\alpha$



150 = 0.05) would require 14 participants. Additional participants were recruited to map responses from each cervical  
151 segment, with a minimum of 5 participants from each level of the cervical enlargement (C5-T1).

## 152 *2.4 Electrophysiology*

153 Stimulation was performed with epidural electrodes in participants undergoing clinically indicated surgery, and the  
154 muscles recorded were those chosen based on the standard montage for cervical spine surgeries performed at our  
155 institutions. After anesthesia induction, only total intravenous anesthesia was used. No anesthetic adjustments were made  
156 during the 15 minutes dedicated to the experiment. Recording and stimulation were performed with Cadwell Elite/Pro,  
157 Cadwell IOMAX (Cadwell Inc.) or XLTEK Protektor32 (Natus Medical Inc.) intraoperative monitoring systems. The  
158 stimulation device chosen for a particular experiment was dependent on the study site and availability (see Table S1).  
159 The experimental procedure began once the dura was exposed and the epidural stimulation electrode was placed.  
160 Muscles were chosen for electromyogram (EMG) per standard of care (Fig. 1A). MEP responses were recorded with  
161 subdermal needles at a sampling rate between 6kHz and 10.4kHz and bandpass filtered between 10Hz and 2000Hz.  
162 Epidural spinal cord stimulation was performed in trains of 3 pulses with a hand-held double ball tip probe (2.3mm  
163 diameter contacts, 10mm spacing); single pulse and catheter electrode stimulation were also used at specific cervical  
164 segments (see Table S1). Stimulation with a 3-pulse train was used to reduce the intensity necessary to evoke an MEP  
165 in order to reduce current spread (36). In each case, the electrodes were oriented in the rostro-caudal direction (Fig. 1A,  
166 inset) with the cathode caudal. At each testing site, stimulation was delivered every 2 seconds, a frequency that we  
167 determined does not alter responses with repeated stimulation (data not shown).

### 168 *2.4.1 Comparison of midline versus lateral stimulation*

169 Within each cervical segment, midline stimulation was compared with lateral stimulation. Midline electrode placement  
170 was determined by visual estimation and confirmed with measurement from the bony landmarks on either side.  
171 Electrodes were allowed to dimple the surface of the dura to approximately one-half the depth of the ball tip. Prior to  
172 the start of the experiment, we designated the lateral stimulation to be performed on the left or right to match each  
173 participant's less impaired side based on clinical signs, symptoms and MRI; this was done to minimize interaction of  
174 neurological deficits on electrophysiological responses.

175 *Stimulation sites and intensity.* An example of one experiment is shown in Fig. 1C. To begin each experiment, the  
176 stimulation electrode was placed on midline at the most caudal segment exposed during surgery. Stimulation intensity  
177 was incrementally increased from 0 to 8mA in order to assess the activation threshold and estimate the subsequent  
178 recruitment curve (minimum 10s per stimulation intensity; first panel Fig. 1C). Threshold was defined as the lowest  
179 stimulation intensity to produce an MEP in the most responsive muscle at the initially tested segment. The threshold of  
180 this muscle (Table S1) was used to set the fixed stimulus intensity (120% of threshold) for 30 seconds of stimulation at  
181 other segments. The experiments proceeded by repeating the stimulation intensity ramp and fixed intensity stimulation  
182 at the equivalent lateral site (second panel of Fig. 1C).

#### 183 *2.4.2 Comparison of responses at different cervical segments*

184 MEPs at multiple segments were compared using the fixed intensity, which was repeated at more rostral segments (third  
185 panel onwards of Fig. 1C). This stimulation protocol was applied in all experiments. Additional experimental conditions  
186 were tested (see supplemental Table S1) using single pulse stimulation and a flexible catheter electrode (1.3mm contacts,  
187 15mm spacing, Ad-Tech Medical Instrument Corp). The catheter could be inserted below the lamina to allow access to  
188 segments not directly exposed surgically. We confirmed that the data from catheter stimulation was similar to the data  
189 recorded with ball electrodes and that exclusion of this data would not substantially change the results (data not shown).

#### 190 *2.5 Data analysis*

191 Data was exported from proprietary intraoperative monitoring software to MATLAB (R2020b) and Python (v3.8) where  
192 analysis was performed. MEPs were quantified using the rectified area under the curve (AUC) calculated in a window  
193 between 6.5ms and 75ms after the start of the first stimulation pulse. In order to indicate the absence or presence of  
194 MEPs (dashed line in Fig. 8, cutoff in Fig. Fig. 10) an equivalent estimate of the 50 $\mu$ V threshold was used as is typical  
195 in non-invasive studies (37). This value was estimated by regressing AUC onto the peak-peak MEP size, resulting in an  
196 AUC of 0.33 $\mu$ Vs.

##### 197 *2.5.1 Statistical analysis*

198 Values are reported as mean  $\pm 2 \times$  SEM except in cases where the median is used. Non-parametric statistical tests are used  
199 throughout (Wilcoxon rank-sum and signed-rank tests,  $\alpha = 0.05$ ).

### 200 *2.5.2 Artifact rejection*

201 Rejection was based on principal component analysis and confirmation by a human observer. The principal components  
202 were computed for a specific muscle and electrode location across multiple stimulation intensities. These principal  
203 components captured the shape of the MEPs, and were regressed with each MEP. The root-mean-square of the regression  
204 error was then used to rank the responses. This ranking sorted the responses so that the most dissimilar waveform shapes  
205 were ranked highest. A manually adjusted sliding scale was then used to reject the highest ranked traces that did not  
206 appear physiological under visual inspection: deflections in baseline, spread of stimulation artifact into the evoked  
207 response, excessive line noise and fluctuations that were not time-locked to other responses. This led to 1,728 of the  
208 112,989 MEPs (1.5%) being rejected.

### 209 *2.5.3 Midline-lateral comparisons*

210 The stimulation efficacy of midline stimulation was compared to lateral stimulation in 4 ways. First, the MEPs for  
211 midline and lateral stimulation at 120% of midline threshold were compared for each individual participant (Fig. 3,  
212 insets), using the Wilcoxon rank-sum test, Bonferroni corrected for the number of participants ( $n = 14$ , all participants  
213 with triple pulse stimulation at midline and lateral locations). Second, the mean AUC for midline and lateral stimulation  
214 across the 14 participants was compared using the Wilcoxon signed-rank test (Fig. 3A). The same method applied to the  
215 triceps muscle MEPs (Fig. 3) was applied to the tibialis anterior responses in Fig. 5. Third, to ensure that differences  
216 observed in specific muscles at specific segments of stimulation were general trends, all of the responses of the 6 arm  
217 and hand muscles were plotted in Fig. 4. The percentage of responses that were larger for lateral stimulation was  
218 computed (Fig. 4, inset for each muscle). The fourth comparison of midline versus lateral stimulation was performed  
219 using recruitment curves. The curves were used to estimate thresholds for MEPs and the rate of change of MEPs with  
220 stimulation intensity (slope). A function that approximates a linear recruitment curve was used (see section 2.5.7). In a  
221 single participant where epidural and subdural stimulation sites were tested, midline and lateral conditions were  
222 compared using recruitment curve thresholds (Fig. 7).

#### 223 *2.5.4 Comparison of responses at different cervical segments*

224 All MEPs where the fixed intensity stimulation was used within a single participant were included in this analysis. The  
225 average AUC across participants was computed by using the geometric mean (Fig. 8A). The similarity in MEPs across  
226 segments was measured using the Spearman correlation coefficient, calculated between all segments across muscles for  
227 each participant (see Fig. 8B1-2) and then averaged across participants (see Fig. 8B3). To demonstrate similarity across  
228 segments, hierarchical agglomerative clustering was applied (38). This procedure recursively calculates the correlation  
229 between conditions and merges them to create a correlation between clusters which is displayed as a dendrogram. The  
230 similarity in MEPs across segments was quantified using the Spearman correlation coefficient, calculated between all  
231 segments across muscles for each participant and then averaged across participants. The merging procedure is based on  
232 the linkage metric which was conservatively set to the minimum distance ( $1 - \text{correlation}$ ). We set the cluster cutoff at  
233 70% of the maximum distance.

#### 234 *2.5.5 Midline-lateral versus rostral-caudal and anterior-posterior comparison of waveform shape and latency*

235 To test the hypothesis that midline and lateral stimulation activate largely overlapping circuitry, an analysis of midline  
236 and lateral waveform shape (39) and onset latency was performed. Stimulation intensity impacts MEP size which is  
237 known to impact MEP shape (40). Consequently, it is important to match size across conditions before calculating  
238 similarity. For muscles of the arm and hand in all participants at the most caudal stimulated level, the fixed intensity  
239 MEP size at midline was matched to the MEP size in the lateral recruitment curve (a match was defined as an AUC  
240 difference less than  $0.5\mu\text{Vs}$ ). If a match was found, two computations were performed to determine the overall similarity  
241 of the waveforms, independent of their size. First, the onset latency of these waveforms was computed based on the  
242 averages at each site (first deflection greater than  $10\mu\text{V}$ ). Second, the correlation of these waveforms was computed;  
243 this was done at multiple delays (from  $-12.5\text{ms}$  to  $12.5\text{ms}$ ) in order to determine similarity independent of differences in  
244 onset latency. The maximum correlation across these delays was then used to represent similarity.

245 In contrast to midline-lateral stimulation, we expected stimulation across different rostral-caudal segments to activate  
246 different circuits and consequently produce larger differences in onset latencies and waveform shapes. In order to  
247 calculate these metrics across segments, the same method developed to compare midline-lateral metrics was used to

248 compare a fixed intensity MEP size at a rostral level to a size matched MEP at a more caudal level, where a recruitment  
249 curve was recorded. Waveform similarities and differences in onset latencies were compared between the midline-lateral  
250 condition and the rostral-caudal condition pooled across the segments. Due to the relatively low number of matches in  
251 MEP size, individual muscles were treated as independent from each other for this analysis (as indicated by the insets  
252 of Fig. 9A).

253 Finally, we tested the difference in responses from anterior and posterior spinal cord stimulation. This was done for two  
254 reasons: to determine whether responses are mediated by different pathways and to show that differences in responses  
255 would be detected by the waveform analysis. We expected that MEPs generated from lateral posterior stimulation would  
256 produce large differences in waveform shape when compared to anterior stimulation. This analysis was possible in a  
257 single participant where anterior and posterior segments were exposed and the dorsal root entry zone and corresponding  
258 ventral root location could be targeted. To determine whether waveform shape was more or less different in the anterior-  
259 posterior condition compared to the midline-lateral condition, the anterior-posterior similarity metric was ranked relative  
260 to the midline-lateral metrics and reported as a percentile. The latency difference was not calculated for this condition  
261 because stimulation artifacts caused baseline shifts that made the onset time estimation unreliable.

#### 262 *2.5.6 Estimating the change in MEP produced by moving electrodes midline to lateral versus between segments*

263 Comparisons between movement of electrodes along both the midline-lateral and rostro-caudal axes was possible in 9  
264 participants. The segment of maximum AUC caused by lateral stimulation was first identified for each muscle group;  
265 subsequently the differences between MEP sizes at this and neighboring segment(s) were calculated. If two neighboring  
266 segments were present, the two differences were calculated and then averaged. Similarly, the difference between the  
267 lateral MEP and midline MEP sizes at the same segment was calculated for each muscle. The differences in MEPs were  
268 then normalized by distance by dividing MEP values by a generic inter-root length for the rostro-caudal axis and half  
269 the transverse cord diameter for the midline versus lateral placement. Distance estimates were derived from a human  
270 cadaveric study (41), in which inter-root distances in the cervical spinal cord (average 12.5mm) and midline to lateral  
271 distance (average 6.7mm) were measured. Each participant had the MEP sizes across muscles averaged; a Wilcoxon  
272 signed-rank test was applied to determine the relative change along each axis.

### 273 2.5.7 Estimation of threshold and slope

274 Recruitment curves were collected at only one segment per participant because of time constraints. Recruitment curves  
275 were fit to enable comparison of slope and threshold across multiple segments. Specifically, the stimulation intensity  
276 and AUC relationship was modeled as a softplus function:  $y_{j,m,l} = o_{j,m} + \frac{b_{j,m,l}}{k} \log(1 + ke^{-x^{-x_{j,m,l}^{th}}})$ , where  $y_{j,m,l}$   
277 represents the AUC for a given participant ( $j$ ), muscle ( $m$ ) and electrode location ( $l$ ) for a given stimulation intensity  $x$ .  
278 Symbols  $o$ ,  $b$  and  $x^{th}$  represent the recruitment curve offset, slope and threshold respectively. The parameter  $k$  was set to  
279 20 to approximate a linear rectified function while maintaining numerical stability. A fit was performed with a  
280 generalized pattern search algorithm (see Supplemental Methods) for every muscle and participant simultaneously for  
281 multiple locations on the spinal cord (due to the shared offset). A shared offset was used because a subset of data did  
282 not test a stimulus intensity below MEP threshold. In order to compare thresholds across the midline and lateral  
283 conditions across participants, a Wilcoxon signed-rank test was used on the difference between midline and lateral  
284 estimates averaged across segments and muscles. The same procedure was used for a comparison of the slope estimates.

## 285 3 Results

### 286 3.1 Participant recruitment and characteristics

287 Participants (n = 25, twelve male and thirteen female) underwent surgery that exposed the cervical enlargement for  
288 electrical stimulation; their demographics and clinical findings are summarized in Table 1. Mean age of study  
289 participants was 65.5 years (range 39 to 83). Twenty-two patients had chronic symptoms, and three patients had subacute  
290 symptoms. Twenty-one patients had clinical signs of myelopathy or myeloradiculopathy (22 had T2 signal change on  
291 MRI, indicating myelopathy); the remaining patients had radiculopathy alone.

292

**Table 1. Clinical characteristics of participants. See Supplemental Table 1 for associated experiment parameters.**

|     | Age*/Sex | mJOA | Symptom onset | Dominant Syndrome  | Unsteady Gait | Pain                      | Numbness | Weakness | Hyperreflexia     |                   | Sphincter dysfunction | T2 signal change |
|-----|----------|------|---------------|--------------------|---------------|---------------------------|----------|----------|-------------------|-------------------|-----------------------|------------------|
|     |          |      |               |                    |               |                           |          |          | Upper Extremities | Lower Extremities |                       |                  |
| P01 | 67M      | 14   | Chronic       | Myeloradiculopathy | No            | Radiating                 | Yes      | Yes      | No                | No                | No                    | None             |
| P02 | 48F      | 14   | Chronic       | Radiculopathy      | No            | None                      | Yes      | Yes      | Yes               | No                | No                    | C2-3, C4-5, C5-6 |
| P03 | 58M      | 10   | Subacute      | Myelopathy         | Yes           | None                      | Yes      | Yes      | No                | No                | Yes                   | C4-5, C5-6       |
| P04 | 54M      | 17   | Chronic       | Radiculopathy      | No            | Radiating                 | Yes      | No       | No                | No                | No                    | C3-4, C6-7       |
| P05 | 74F      | 12   | Chronic       | Myeloradiculopathy | Yes           | Radiating                 | Yes      | Yes      | Yes               | Yes               | No                    | C3-7             |
| P06 | 71F      | 11   | Chronic       | Myelopathy         | No            | Radiating                 | Yes      | Yes      | Yes               | No                | No                    | C4-5, C5-6       |
| P07 | 62M      | 10   | Chronic       | Myelopathy         | Yes           | None                      | Yes      | Yes      | Yes               | Yes               | No                    | C6-7             |
| P08 | 83F      | 14   | Chronic       | Myeloradiculopathy | No            | Radiating                 | No       | Yes      | Yes               | Yes               | No                    | C3-4, C4-5, C5-6 |
| P09 | 72F      | 12   | Subacute      | Myelopathy         | No            | Axial Neck                | Yes      | Yes      | No                | No                | No                    | C3-4             |
| P10 | 70F      | 10   | Chronic       | Myelopathy         | No            | Radiating                 | Yes      | Yes      | Yes               | No                | No                    | C3-4, C4-5, C6-7 |
| P11 | 74F      | 13   | Chronic       | Myeloradiculopathy | No            | Radiating                 | Yes      | Yes      | No                | No                | No                    | C3-4             |
| P12 | 50F      | 11   | Chronic       | Myeloradiculopathy | No            | Radiating                 | Yes      | Yes      | Yes               | No                | No                    | C5-7             |
| P13 | 60M      | 17   | Chronic       | Radiculopathy      | No            | None                      | Yes      | No       | No                | No                | No                    | C3-4             |
| P14 | 74M      | 15   | Chronic       | Myelopathy         | Yes           | Axial neck                | No       | No       | Yes               | Yes               | No                    | C4-5             |
| P15 | 75M      | 16   | Chronic       | Myeloradiculopathy | Yes           | Axial neck                | Yes      | Yes      | No                | No                | No                    | None             |
| P16 | 54M      | 17   | Chronic       | Radiculopathy      | No            | Radiating                 | Yes      | No       | No                | No                | No                    | C6-7             |
| P17 | 71F      | 11   | Chronic       | Myeloradiculopathy | Yes           | Axial neck and radiating  | No       | Yes      | Yes               | Yes               | No                    | C3-4             |
| P18 | 56M      | 11   | Chronic       | Myeloradiculopathy | Yes           | Axial neck and radiating  | No       | Yes      | Yes               | Yes               | No                    | C2-3, C3-4, C5-6 |
| P19 | 39M      | 10   | Chronic       | Myelopathy         | Yes           | None                      | Yes      | Yes      | No                | No                | Yes                   | C4-5             |
| P20 | 78F      | 14   | Chronic       | Myelopathy         | Yes           | Axial neck and upper back | No       | Yes      | No                | No                | No                    | None             |
| P21 | 72F      | 12   | Chronic       | Myelopathy         | Yes           | Axial neck                | No       | Yes      | No                | No                | No                    | C3-4, C4-5, C6-7 |
| P22 | 76F      | 10   | Chronic       | Myeloradiculopathy | Yes           | Axial neck and radiating  | Yes      | Yes      | No                | No                | Yes                   | C5-6             |
| P23 | 49F      | 17   | Chronic       | Myeloradiculopathy | Yes           | Axial neck and radiating  | Yes      | Yes      | Yes               | Yes               | No                    | T1-2             |
| P24 | 79M      | 11   | Chronic       | Myelopathy         | Yes           | None                      | Yes      | Yes      | No                | Yes               | No                    | C4-5, C5-6       |
| P25 | 71M      | 13   | Subacute      | Myelopathy         | Yes           | None                      | Yes      | Yes      | No                | No                | No                    | C3-4, C4-5, C5-6 |

\*At the time of surgery. mJOA, modified Japanese Orthopaedic Association (mJOA) score.



295 3.2 Location of stimulating electrodes

296 The location of the stimulating electrodes was determined two ways. First, electrode location based on anatomical  
297 landmarks (Fig. 2A1) was identified in an intraoperative CT (Fig. 2A2) and then coregistered (Fig. 2A3) into MRI space  
298 in one participant. The location of the electrode was confirmed to be over the C7 dorsal root entry (Fig. 2A4), where it  
299 had been placed intraoperatively.

300 As a secondary confirmation of the electrode placement strategy, an additional experiment was performed in a patient  
301 undergoing laminectomy and dural opening for resection of intradural meningioma. Electrodes were placed relative to  
302 anatomical landmarks as for epidural stimulation, and once the dura was removed confirmation was made that the  
303 location matched the dorsal root entry zone (Fig. 2B).

304

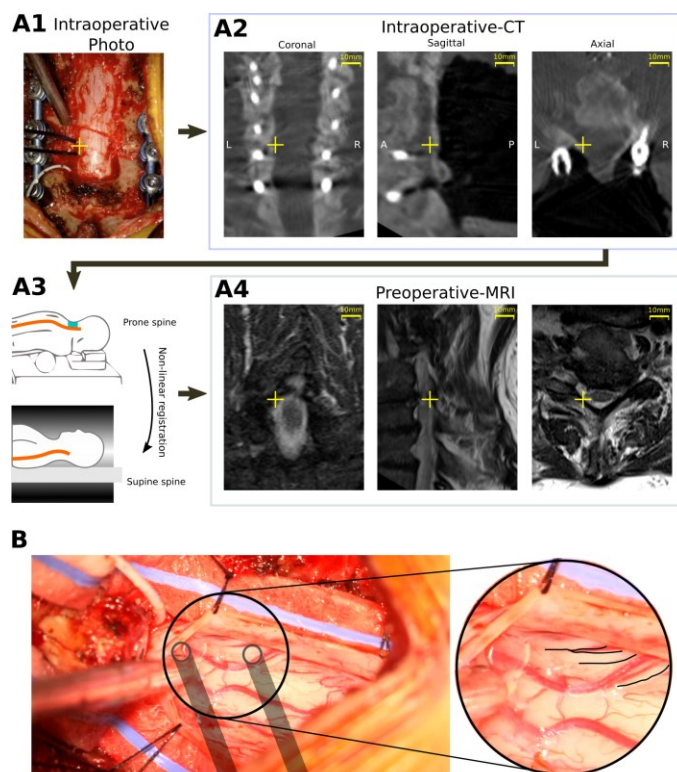

**Figure 2. Validation of stimulation location relative to dorsal root entry zones. (A)** Transformation of electrode stimulation site from physical location to MRI space. (A1) A photograph was used to identify the position of electrodes relative to instrumentation. (A2) This location was translated to a CT scan used to confirm implant location (yellow crosshatch). (A3) CT and MRI images were co-registered by performing a non-linear segmental registration (Brainlab AG) to account for differences in spinal alignment found in prone (operative) and supine (preoperative) positions. (A4) Electrode position in MRI near targeted C7 root verified location. **(B)** Exposed subdural region with overlaid location of stimulated location and dorsal roots highlighted in inset. Placement based on anatomical landmark identification was confirmed to position the electrodes over the dorsal root entry zones.



305 *3.3 Lateral stimulation is more effective than midline stimulation*

306 Comparison of spinal motor evoked potentials (MEPs) to stimulation at midline and lateral locations was performed in  
307 14 participants. We confirmed that placing the electrodes in the lateral position located them over the dorsal root entry  
308 zone, where afferent axons enter the spinal cord (Fig. 2). Fig. 3 shows MEPs in response to midline (dark) or lateral  
309 (light) stimulation, using an intensity set to 120% of the threshold for midline MEPs. Lateral stimulation of the cervical  
310 spinal cord generated larger MEPs than midline stimulation across participants (Fig. 3A; mean midline AUC =  
311  $1.14 \pm 0.82 \mu\text{Vs}$ , lateral AUC =  $4.71 \pm 2.28 \mu\text{Vs}$ , Wilcoxon signed-rank test,  $p = 0.002$ ,  $n = 14$ ). These changes correspond  
312 to a median increase of 258% in the MEP when stimulating laterally versus at midline. The subplots in Fig. 3B show  
313 raw MEPs of the 14 participants. The upper insets show violin plots of the lateral and midline MEPs for each individual,  
314 with asterisks indicating significant differences ( $p < 0.05$ , Bonferroni corrected Wilcoxon rank sum test). Ten of 14  
315 participants showed significantly increased MEPs with lateral stimulation compared with midline.

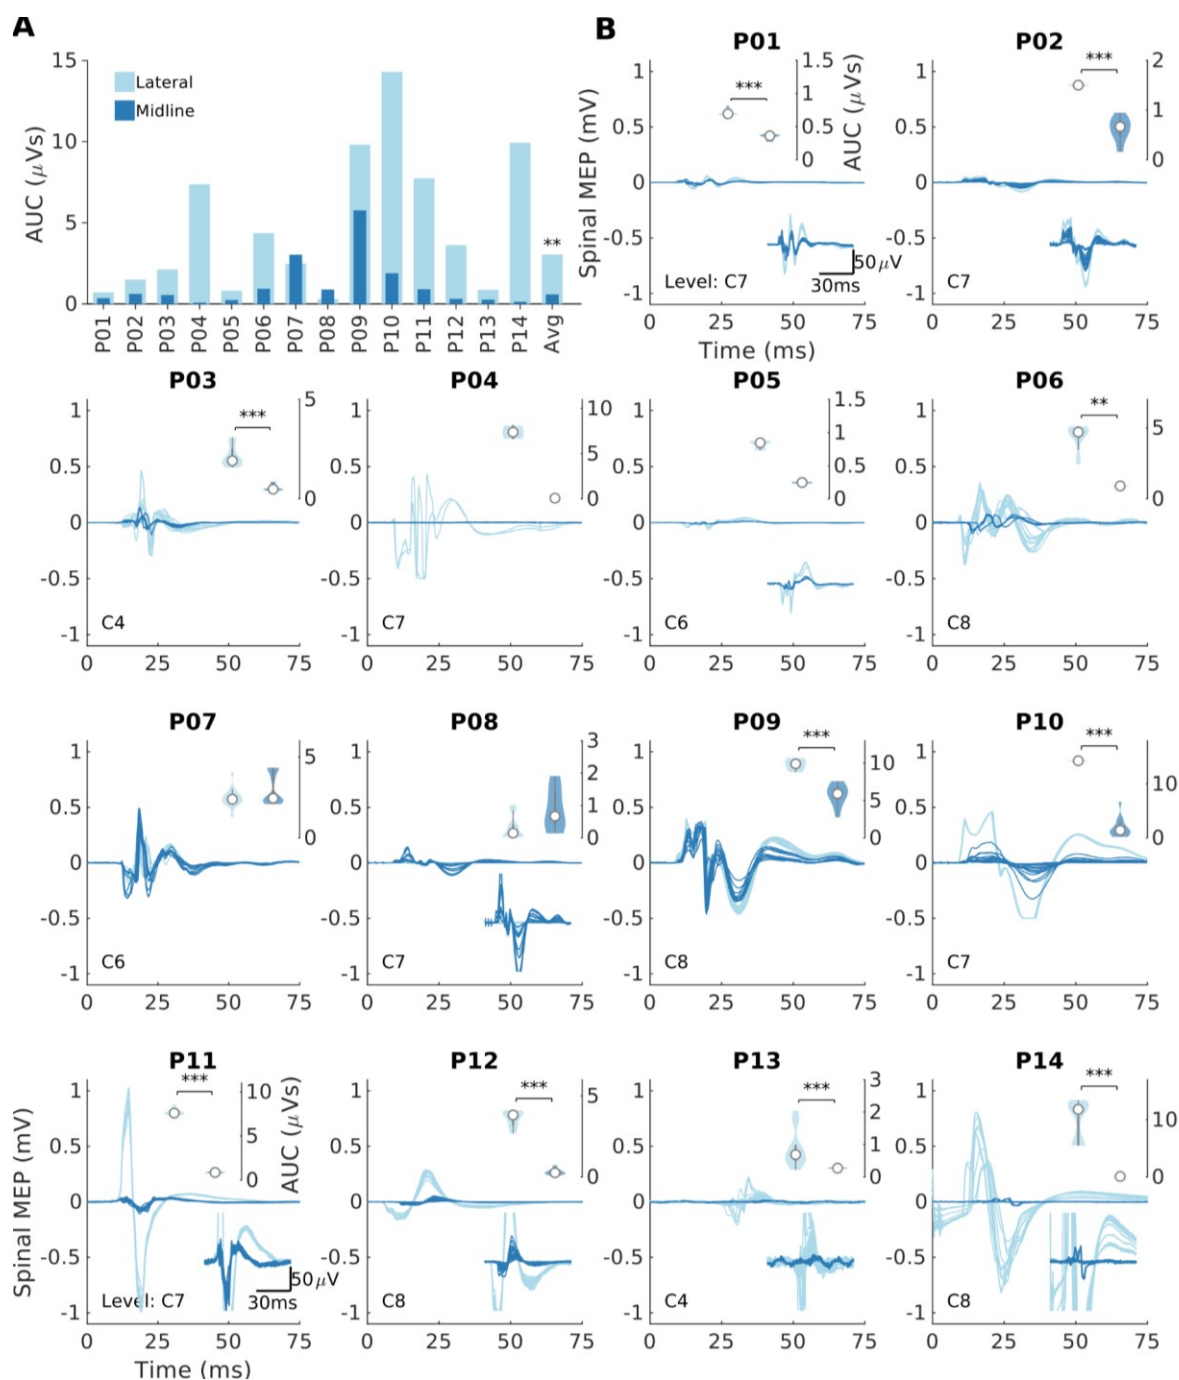

**Figure 3. Lateral stimulation is more effective than midline stimulation. (A)** Summary of the rectified area under the curve (AUC) of the triceps muscle at the most caudal segment where a response was present. Midline simulation (dark color) and lateral (light color) stimulation were performed at the fixed intensity for each participant. Lateral stimulation produced consistently larger responses for the most caudal responsive segments. A signed-rank test was applied between the midline and lateral conditions. Average bar represents the median. **(B)** Individual MEPs that compose the summary plot for individual participants. Bottom inset of each panel represents a magnification of the MEP in cases where the response is small. Top inset of each panel shows a violin plot of AUC (white circle represents the median). Within-participant Wilcoxon rank-sum tests were conducted in individual participants (\* $p < 0.05$ , \*\* $p < 0.01$ , \*\*\* $p < 0.001$ , Bonferroni corrected for multiple comparisons). Note that for P04, P09 and P10 the signal saturated at 0.5mV due to a limitation of the recording hardware.

316 The greater effectiveness of lateral compared to midline stimulation was not unique to a specific muscle or any particular  
317 segment. Fig. 4 shows each of the six arm muscles in which MEPs were recorded and the six spinal segments that were  
318 stimulated. Each dot represents the lateral (y-axis) and midline (x-axis) responses to stimulation at the various segments  
319 in each of the participants. All responses above the  $x = y$  line represent larger lateral than midline MEPs. On average,  
320 across participants, segments and muscles, 91.5% of MEPs were larger when the spinal cord was stimulated laterally.

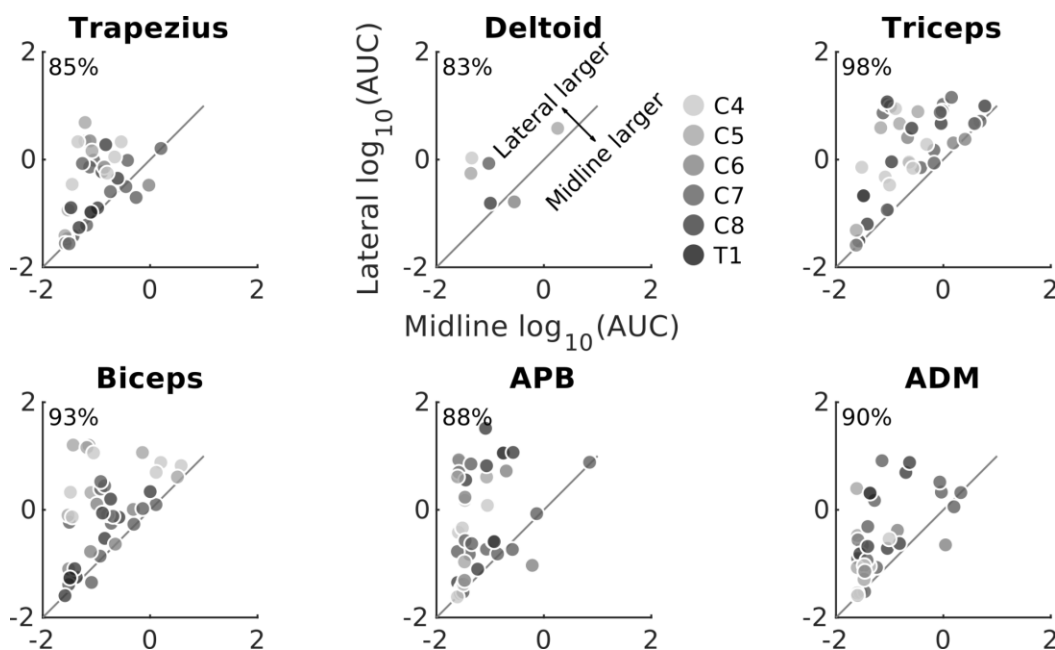

**Figure 4. Lateral stimulation is more effective than midline stimulation regardless of stimulation segment or recorded muscle.** AUC from all segments and muscles for all participants in whom both midline and lateral stimulation was performed. AUC was larger when stimulation was applied laterally than at midline in the majority of tested cases. The percentage of MEPs that were larger in lateral than midline stimulation is shown in the upper left corner of each plot.

321 The increased effectiveness of lateral stimulation in the cervical cord was also observed in the leg muscles. Fig. 5A  
322 shows the summary of responses for midline (dark) or lateral (light) stimulation. In the 6 out of 14 participants who had  
323 tibialis anterior (TA) MEPs in response to cervical stimulation, lateral cervical stimulation generated larger leg MEPs  
324 than midline stimulation ( $AUC = 0.11 \pm 0.10 \mu Vs$ , lateral  $AUC = 2.43 \pm 1.54 \mu Vs$ , Wilcoxon signed-rank test,  $p = 0.031$ ,  
325  $n = 6$ ). The subplots in Fig. 5 show raw MEPs of the 6 participants. The upper insets show a violin plot of the lateral and  
326 midline MEPs for that individual ( $p < 0.05$ , Bonferroni corrected Wilcoxon rank sum test). All of the 6 participants  
327 showed significantly increased MEPs with lateral stimulation compared with midline.

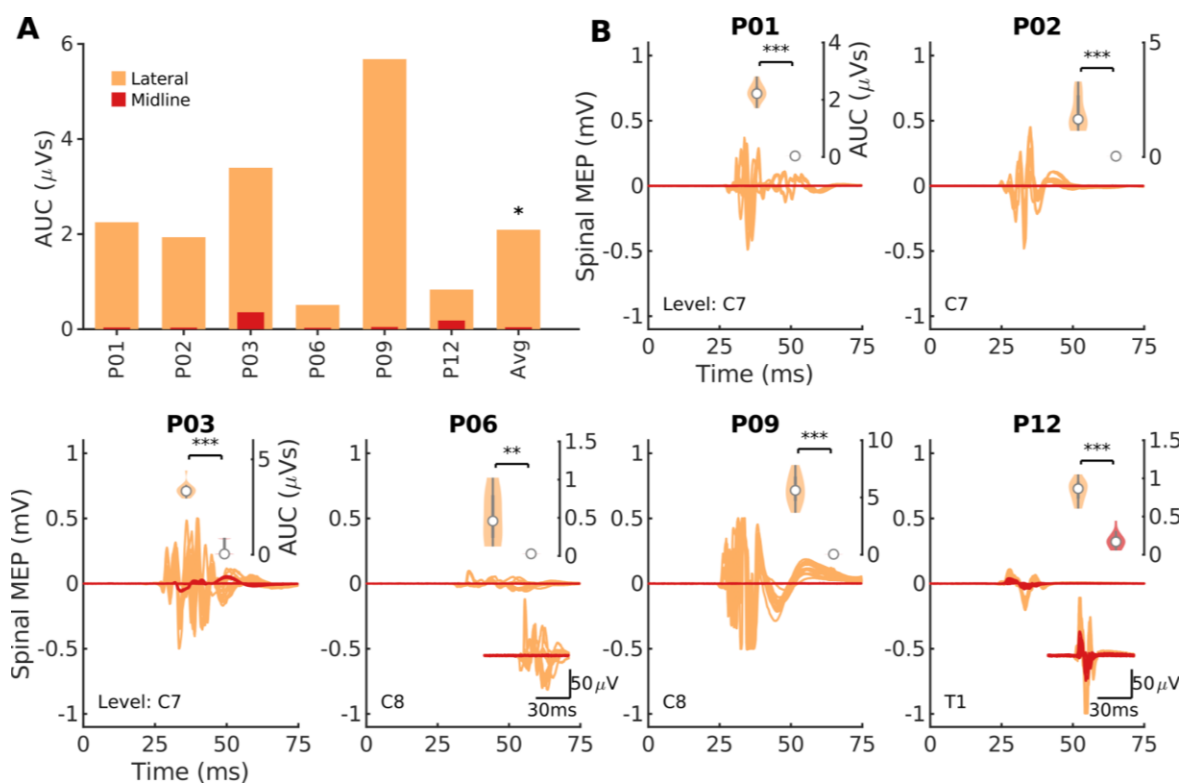

**Figure 5. A subset of participants display activation in their leg muscles when stimulation is applied in the cervical cord. (A)** Summary of the rectified area under the curve (AUC) of the tibialis anterior (TA) muscle at the most caudal segment where a response was present. Midline stimulation (dark color, red) and lateral (light color, orange) stimulation was performed at the fixed intensity for each participant. Motor evoked potentials (MEPs) are shown for the most caudal responsive segment. In a subset of participants that display activation of tibialis anterior (AUC greater than  $0.33\mu\text{Vs}$ ), lateral stimulation produced consistently larger responses. A signed-rank test was applied between the midline and lateral conditions; the average bar represents the median value. **(B)** Individual spinal MEPs that compose the summary plot for individual participants. Bottom inset of each panel represents a magnification of the MEP in cases where the response was small. Top inset of each panel shows a violin plot of AUC (white circle represents the median). Within participant Wilcoxon rank-sum tests were conducted in individual participants ( $*p < 0.05$ ,  $**p < 0.01$ ,  $***p < 0.001$ , Bonferroni corrected for multiple comparisons). Note that for P09 the signal saturated at  $0.5\text{mV}$  due to a limitation of the recording hardware.

328

### 329 3.4 Lateral MEPs are larger due to lower thresholds and steeper recruitment curves

330 The increased effectiveness of lateral stimulation may be driven by a reduction in the threshold for recruitment, an  
 331 increase in the rate of change of MEP size with stimulation intensity (slope of the recruitment), or both. Recruitment  
 332 curves were fitted in order to estimate these parameters directly from data where multiple stimulation intensities were  
 333 tested at the same segment (e.g. Fig. 1C, C7). Examples of the recruitment curve threshold and slope estimation  
 334 procedure for the triceps muscle of two participants are shown in Fig. 6A for midline and lateral stimulation. Across  
 335 participants, average threshold increased 107% for midline stimulation over lateral stimulation, indicating higher

336 stimulus intensity was needed to evoke an MEP ( $p = 2 \times 10^{-4}$ , Wilcoxon signed-rank test,  $n = 13$ ; Fig. 6B). The rate of  
 337 increase of MEP size with stimulation intensity was also influenced by the site of stimulation, with a median increase in  
 338 the slope of 34% for lateral stimulation compared to midline stimulation ( $p = 0.010$ , Wilcoxon signed-rank test,  $n = 13$ ;  
 339 Fig. 6C). Thus, lateral stimulation was more effective than midline stimulation both because of a lower threshold and  
 340 because of an increased slope of the recruitment curve.

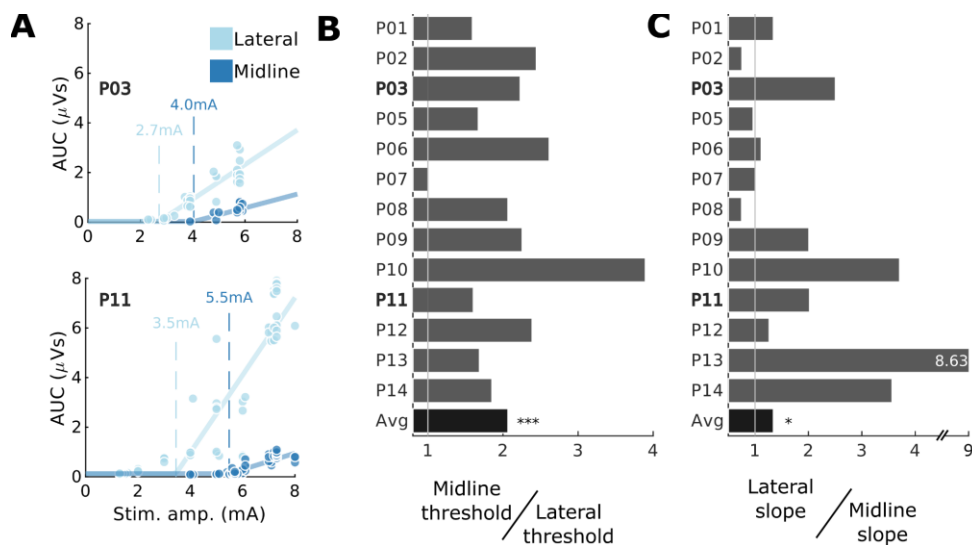

**Figure 6.** Larger lateral MEPs are driven by both a reduction in threshold and increase in slope. **(A)** The threshold of muscle activation was determined by fitting functions to sections of data where multiple stimulation intensities were used. Circles indicate individual data points (light color, lateral; dark color, midline), solid lines show example fitted functions, and dashed lines show estimates of threshold. Triceps muscle is being shown for two participants as indicated in inset text. **(B)** The relative efficacy of lateral stimulation can be summarized as midline threshold  $\div$  lateral threshold (lower lateral threshold indicates higher lateral efficacy). The majority of participants showed lower lateral than midline threshold. **(C)** Lateral to midline slope ratio (lateral slope  $\div$  midline slope). The majority of participants showed steeper recruitment slopes from stimulation at lateral sites. Note that one participant has been omitted (P04) as there was insufficient range in tested stimulation intensities to perform model fitting. Average bar represents the median.

### 341 3.5 Lateral stimulation efficacy is most pronounced when applied under the dura

342 Stimulation was applied midline and laterally below the dura at the T1 root level, and at matched epidural locations.  
 343 Across the three muscles activated (Fig. 7A-B), the lowest intensity stimulation was found for stimulation of the dorsal  
 344 root entry zone below the surface of the dura, followed by lateral epidural, midline subdural and lastly midline epidural  
 345 stimulation locations.

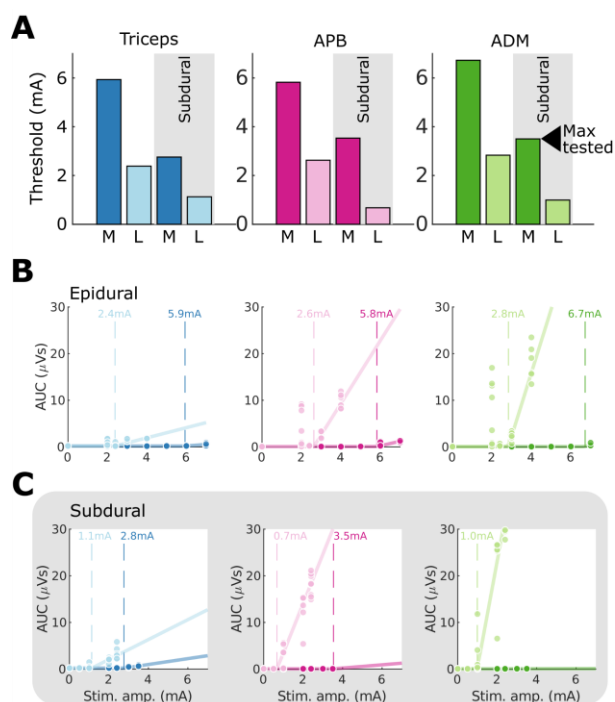

**Figure 7. Comparison of subdural and epidural stimulation intensity thresholds at midline and laterally. (A)** Summary of thresholds for midline (M, dark colors) and lateral (L, light colors) epidural and subdural stimulation across the three activated muscles. **(B)** The threshold of muscle activation for epidural stimulation was determined by fitting functions to sections of data where multiple stimulation intensities were used. Circles indicate individual data points, solid lines show fitted functions, and dashed lines show estimates of threshold. **(C)** As for (B), with data from the corresponding subdural stimulation location.

346 3.6 Cervical dorsal stimulation evokes MEPs in muscles innervated at that segment but also muscles innervated at  
347 adjacent and remote segments

348 While we predicted a sharp difference in responses between midline and lateral stimulation, we expected smaller  
349 differences with movement between cervical segments along the rostro-caudal axis (Fig. 1B). MEPs were recorded in  
350 arm and leg muscles after a fixed intensity stimulation at 6 different spinal segments (C4-T1). Fig. 8A shows MEP  
351 values for each muscle with stimulation at the segments available for a particular participant. Individual participants are  
352 represented by faint lines, and the group average for each muscle by bold lines. The dashed lines indicate a threshold for  
353 the presence of MEPs. The largest MEPs were observed in the muscles innervated at the stimulated segment. For  
354 example, biceps activation was dominant at C4 and C5, triceps at C6, C7 and C8, and APB at T1. Triceps MEPs were  
355 present at all segments except for T1. Additionally, as shown in Fig. 5, some participants had MEPs in the legs, although  
356 those were always smaller.

357 The patterns of responses are likely to reveal how similar each segment is to the other segments. To determine this, we  
358 calculated the correlation between segments of MEPs from all muscles. Fig. 8B1 or B2 show the results of all the  
359 individual participants that had stimulation at the two segments indicated on the axes. Each dot corresponds to the MEP  
360 for an individual muscle, and all the arm and hand muscles for an individual are used to create a linear correlation  
361 represented by a line. By averaging these correlations across participants (Fig. 8B3), we were able to examine the  
362 similarity of muscle responses across segments without the confound of across-participant variability. MEPs from C7-  
363 T1 largely fell into a cluster more distinct from rostral levels. We used a clustering algorithm to show these relationships;  
364 the correlation within the C7-T1 cluster averaged 0.85, while the correlation within the C4-C6 cluster averaged 0.57.  
365 The correlation between the rostral and caudal clusters was 0.5. Thus, the caudal cluster is strongly related internally,  
366 with much lower correlations to other levels.

367 Our goal was to understand the organization of the intact cervical spinal cord, but the study was performed in people  
368 with myelopathy. To control for the effect of injury to the spinal cord, we performed lateral stimulation on the less  
369 affected side. In addition, we performed an analysis similar to Fig. 8 but excluding responses in all segments where T2  
370 signal change was present. This did not change the pattern of responses significantly (average correlation between MEP  
371 size with and without T2 signal change segments excluded  $r = 0.89$ , Supplemental Fig. S1). This high correlation  
372 suggests that the patterns of muscle activation from cervical spinal cord stimulation were driven largely by the activation  
373 of intrinsic circuits that were spared from the effects of myelopathy.



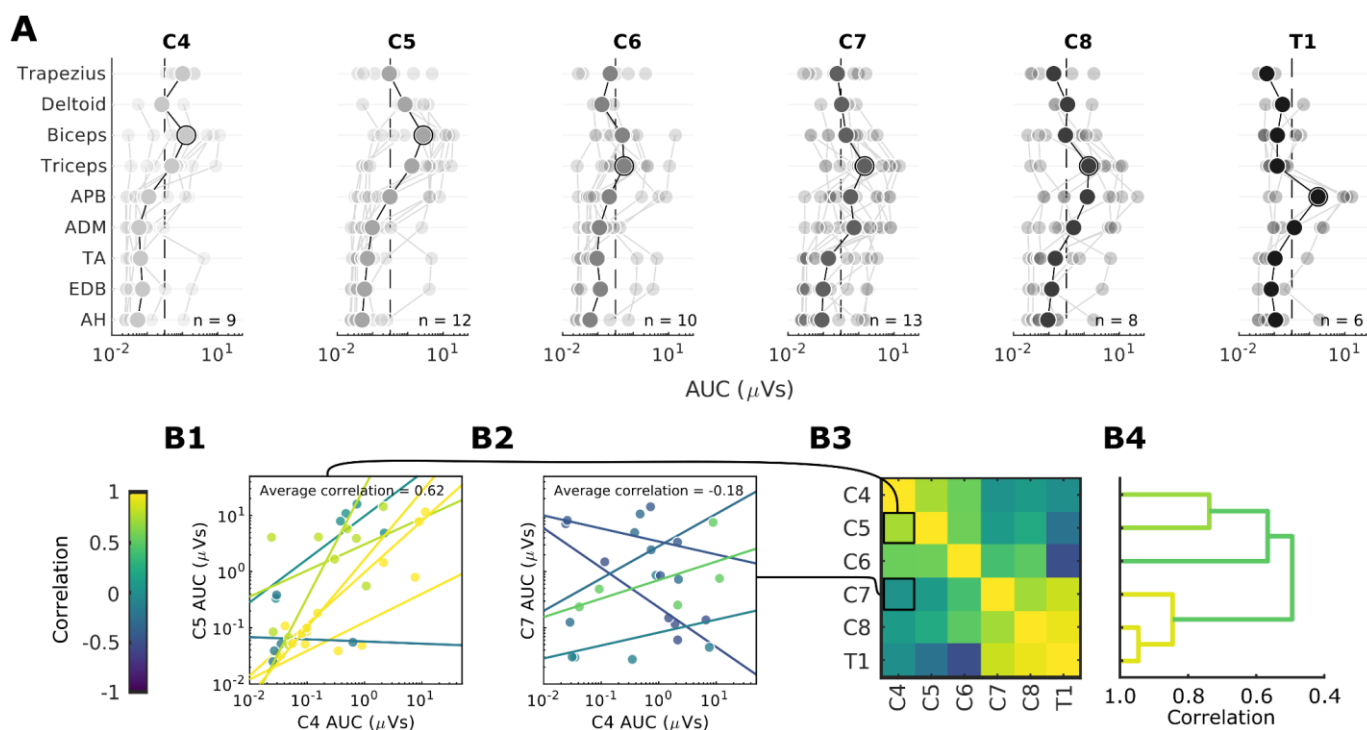

**Figure 8. Rostral-caudal distribution of MEPs.** (A) MEPs for each of the recorded muscles with stimulation are shown for lateral stimulation at segments C4-T1. The data are plotted on a log scale due to the exponential nature of MEPs to show their relative size. The average is shown in bold. Faint lines represent individual participant data (n = 25 total, with the number of participants represented shown within each panel). Dashed line ( $0.33\mu$ Vs) indicates a threshold for presence of MEPs (see Methods). Equivalent figure with T2 signal change segments excluded is shown in Figure S1. (B) Within-participant similarity (correlation) of muscle responses at different segments, averaged across participants. (B1-2) Example AUC data correlations when comparing C4 to C5 (B1) or to a more distant C7 (B2). Nearby segments are highly correlated for the majority of participants (colors represent different participants), while more distant segments are not. (B3) Muscle activation appears to form a distinct cluster formed from lower cervical segments (C7, C8, T1). (B4) Dendrogram constructed from hierarchical clustering of (B3). Individual pairs of correlations are merged into clusters, and the maximum correlation between the entries in these clusters is represented by the width of the merge. Colors represent the maximum correlation within distinct clusters (see Methods).

374 3.7 Similar latencies and waveforms from midline and lateral stimulation matched for size

375 We expect that both midline and lateral stimulation recruit large-diameter afferent axons as they enter the spinal cord.  
 376 While lateral stimulation was far more effective at producing MEPs, we expected that the latency and waveform of the  
 377 resultant MEPs from stimulation in each location would be similar when matched for the size of the MEP (see Methods).  
 378 We examined this by comparing variation in latencies and waveform shape correlations along the midline-lateral  
 379 (Fig. 9A) and rostral-caudal axes. For the single participant that underwent anterior and posterior surgery, the waveform  
 380 shape of the biceps MEPs from the two stimulation aspects appear highly distinct (Fig. 9B), and this is reflected in a low  
 381 correlation ( $r = 0.67$ , 11<sup>th</sup> percentile of the posterior midline and lateral MEP correlations). The difference in onset



latencies between midline and lateral responses was nearly identical ( $0.04 \pm 0.22$ ms), and this was not different from 0ms ( $p = 0.655$ ,  $n = 18$ ). In contrast, the latency from lateral responses at various levels was different (Fig. 9C), with longer latencies from progressively more distant segments; pooled across segments, the latency was different from the midline-lateral condition ( $0.83 \pm 0.22$ ms,  $n = 24$ ,  $p = 0.002$ ). We also tested the similarity in waveforms between conditions. MEP waveforms were very similar between midline and lateral stimulation ( $r = 0.89 \pm 0.04$ , Fig. 9D). The similarity became less across more distant segments (Fig. 9D); waveforms were more similar for the midline-lateral correlation than across segments (pooled  $r = 0.77 \pm 0.05$ ,  $n = 24$ ,  $p = 0.029$ ).

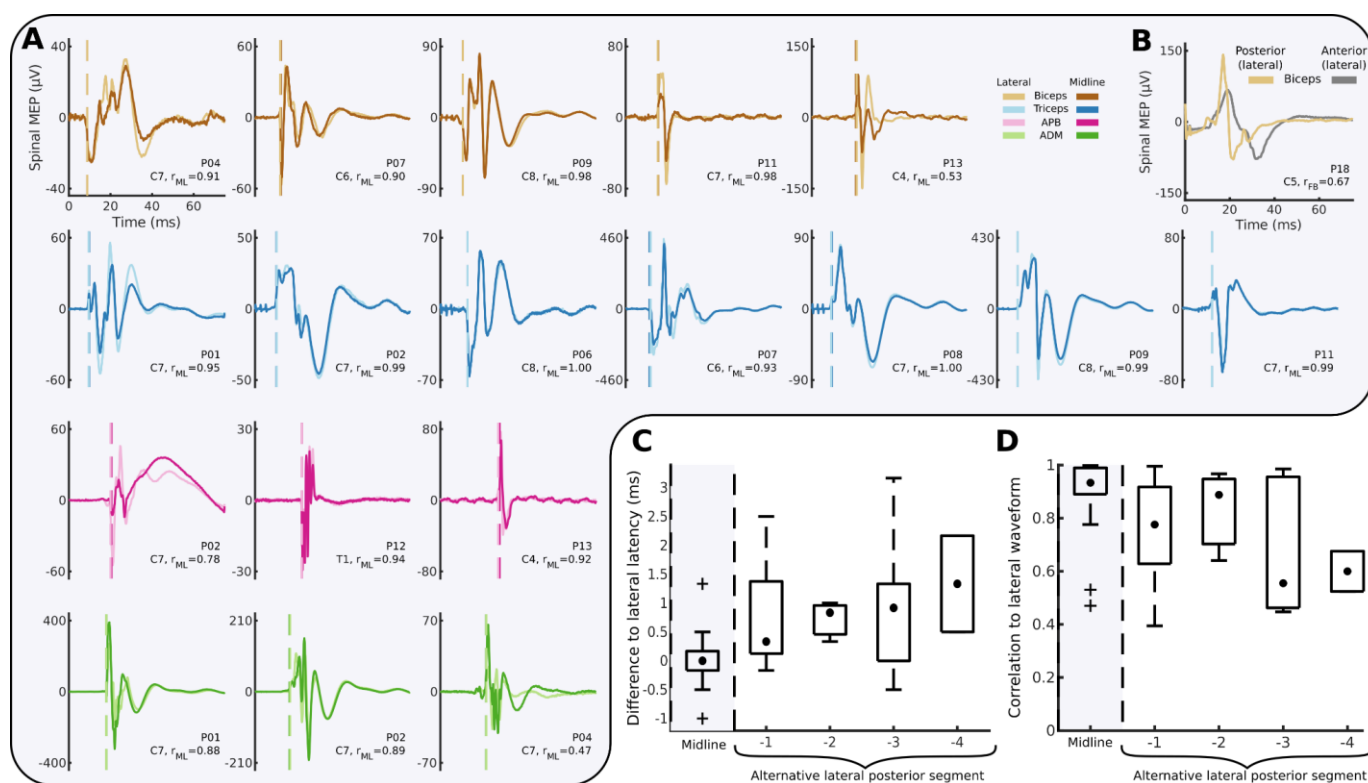

**Figure 9. Comparison of midline-lateral, rostral-caudal and posterior-anterior waveform shapes. (A)** Averaged midline (dark colors) and lateral (light colors) MEPs matched for size are highly similar.  $r_{ML}$  indicates the correlation between the two waveforms after adjusting for potential differences in onset latencies. **(B)** Waveform shapes for posterior-anterior comparison for a single participant in the biceps muscle appear highly distinct from each other. **(C)** Box plot of onset latencies for midline and lateral MEPs as in (A) (gray background), compared to onset latencies between lateral MEPs and MEPs at alternative lateral segments (white background). Midline-lateral latency differences are centered around 0ms, while latency differences increase with more distant segments. **(D)** Box plot of the averaged midline and lateral MEPs as in (A) (gray background), compared to correlations between lateral MEPs and MEPs at alternative lateral segments (white background). Midline-lateral correlations are higher than neighboring rostral-caudal correlations which appear to decrease at more distant segments. Hinges represent first and third quartile and whiskers span the range of the data not considered outliers (defined as  $q_3 + 1.5 \times (q_3 - q_1)$  or less than  $q_1 - 1.5 \times (q_3 - q_1)$ ).

389

390

391 3.8 Map of MEPs produced by epidural stimulation of the cervical spinal cord.

392 Fig. 10A summarizes the muscles activated by stimulation at each cervical segment. Circle area corresponds to the  
393 percent of total MEP size contributed by specific muscles (designated by color), and the darkness of the circle  
394 corresponds to the number of participants. Only MEPs that were on average greater than  $0.33\mu\text{Vs}$  are shown,  
395 highlighting the dominant muscles at each segment. While all lateral stimulation sites met this threshold, the only midline  
396 response above this threshold was the triceps MEP at C7 and C8. This map demonstrates the activation of specific  
397 muscles at each segment of the cervical spinal cord.

398 Differences between MEP size were larger between midline and lateral stimulation within segments than between  
399 segments. To quantify this, we determined change in MEPs as a function of distance – how much does the MEP change  
400 with each millimeter that the stimulating electrode was moved in each direction. The average MEP size was reduced at  
401 a rate of  $0.39\pm 0.24\mu\text{Vs}/\text{mm}$  when moving from lateral to midline. On the other hand, MEP size from stimulation of  
402 neighboring segments was reduced at a lower rate of  $0.15\pm 0.08\mu\text{Vs}/\text{mm}$ . The rate of change was more than double for  
403 lateral-midline electrode position compared with rostral-caudal position, and this difference was highly significant ( $p =$   
404  $0.008$ ,  $n = 9$ ).

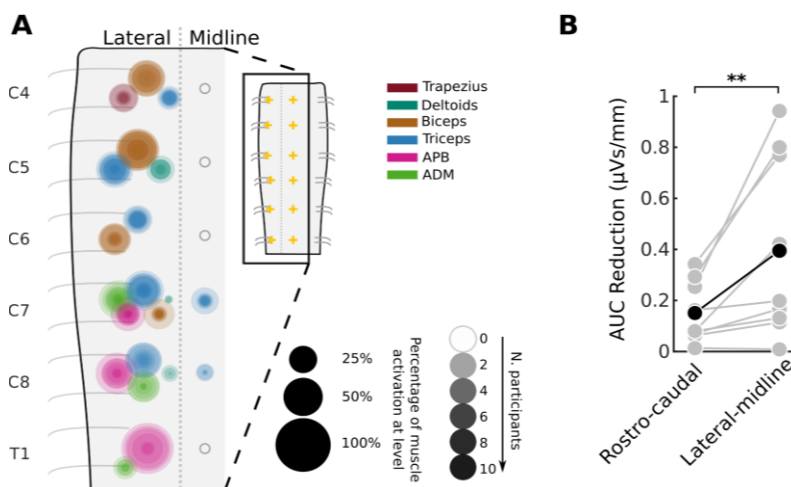

**Figure 10. An actionable map for epidural stimulation of the cervical spinal cord. (A)** Area of overlaid circles represents the rectified area under the curve (AUC) of individual participants. Activation is only drawn when the across-participant average AUC is greater than  $0.33\mu\text{Vs}$  (see methods). Empty circles represent no muscle activation reached this threshold. (Data shown here is a summarized representation of data shown in Fig. 8A). Inset: Crosses mark locations of stimulation. **(B)** Greater change in AUC in the lateral-midline axis as compared to the rostral-caudal axis. Individuals are shown as gray dots with lines connecting their values, and the average of the participants in black.

#### 405 **4 Discussion**

406 In addition to the empiric map, these results demonstrate the underlying organization of the human cervical spinal cord.  
407 The largest changes in stimulus response were observed between midline and lateral locations which is likely due to the  
408 greater efficacy of recruitment when the electrodes were placed over the dorsal root entry zone. Consistent with this, the  
409 relative efficacy of lateral stimulation was maintained when stimulating below the dura over the dorsal root entry zone.  
410 Movement of stimulating electrodes along the rostro-caudal axis resulted in more subtle differences in motor responses,  
411 suggesting the presence of strong overlap with adjoining segments. Clustering of these responses was particularly strong  
412 within lower cervical segments (C7, C8, T1), with more diversity at other levels. Finally, we observed MEPs arising  
413 from distant segments of the cervical spinal cord and from leg muscles, indicating potential activation of propriospinal  
414 connections (16, 42). Thus, the summary map of responses (Fig. 8A) provides a guide to target muscles via dorsal  
415 cervical spinal cord stimulation but also an organizational map of neural connections that can be recruited with this  
416 technique.

417 The observed differences in MEP size between midline and lateral stimulation and between neighboring segments have  
418 support in the literature. However, our work provides novel electrophysiological evidence that midline and lateral  
419 stimulation predominantly activates the same circuitry, while stimulation at more distant lateral rostral-caudal sites  
420 incorporates additionally more diverse circuits. The significantly different MEP morphology in response to anterior  
421 stimulation suggests that the MEPs generated in response to dorsal stimulation are indeed mediated through the dorsal  
422 afferent pathways rather than through direct activation of the motor neuron via spread to the ventral horn. Unexpected  
423 spread of responses beyond the stimulated segment has been reported (31), even with intraspinal cervical stimulation  
424 (36, 43). Activation of leg muscles from stimulation of the cervical cord has also been found (31–33, 44). Consistent  
425 with these findings we observed long-range activation, for example triceps activation with C4 stimulation and leg  
426 activation with cervical stimulation. Such activation cannot be explained by known locations of motor pools and  
427 intermingling of motoneuron cell bodies (26, 27) and suggests the presence of long distance connections within the  
428 cervical enlargement (29, 45, 46) and between the cervical and lumbar enlargements (16, 47–50).

429 Clustering of lower cervical responses may reflect the intrinsic organization of the spinal cord in humans. In the monkey  
430 cervical cord, Greiner et al. demonstrated separation of biceps and triceps by comparing MEPs from stimulation at the

431 C6-C8 segments. However, consistent with human data also described by Greiner et al., our results suggest that this  
432 distinction may be less pronounced in bipedal humans compared with quadrupedal macaques due to the widespread  
433 activation of the triceps muscle. Rather, our results suggest a division between the muscles of the hand and muscles of  
434 the arm. This organization could be engaged to foster adaptive patterns of arm and hand muscle activation.

435 The patterns of muscle activation from dorsal spinal cord stimulation can be provisionally inferred through known spinal  
436 circuits. Spread between adjacent segments (for example, strong activation of biceps from stimulation at C4) may be  
437 mediated by the spread of afferent connections into the spinal cord or the spread of longitudinally extensive motor pools  
438 out of the spinal cord. Some observed responses may be partially driven by non-biological spread of the electric field  
439 across levels (21), but the presence of leg muscle MEPs provides strong evidence that spinal cord pathways represent a  
440 critical mechanism. Additionally, we observe a much larger change in MEP size when electrodes are moved in the  
441 midline-lateral orientation than when they are moved in the rostral-caudal orientation, suggestive of the limitations of  
442 current spread.

443 While the operating room provides a unique experimental setting, it may also limit the generalizability of our findings.  
444 Participants had myelopathy and/or radiculopathy, and these pathologies may affect axonal conduction, neuronal  
445 signaling, or synaptic connectivity. We did, however, perform a sensitivity analysis for the effect of cervical injury by  
446 excluding the segments with T2 hyperintensity, indicative of myelomalacia; excluding these levels did not change the  
447 overall structure of the activation map. MEP size may also have been affected by general anesthesia; however, all  
448 participants were maintained on total intravenous anesthesia, consistent with standard operative and intraoperative  
449 neuromonitoring conditions; in all our experiments we observed clear, reproducible responses at multiple tested  
450 segments. Importantly, anesthetic conditions had reached a steady state during recording, and no changes were made  
451 during the experiment. Because participants were tested in an immobilized position on the operating table, we were not  
452 able to address how epidural stimulation can be used to generate movement (23, 44, 51) or how MEPs interact with body  
453 position (52–55). Normalization of MEPs by their maximal value is indicative of the proportion of recruited motoneurons  
454 and less impacted by sources of variability such as muscle size and subdermal electrode position. However, MEPs could  
455 not be consistently driven to saturation under intraoperative conditions, and data has consequently been presented  
456 without normalization which may have led to some over or under representation of specific muscles. Muscle selection

457 is chosen based on the cervical nerve roots which are most at risk of iatrogenic injury due to surgical maneuvers. Spinal  
458 cord function can be adequately monitored with a minimal amount of upper and lower extremity recording sites, but  
459 multiple muscle groups are required to be nerve root specific. Specific muscle groups are chosen based on accepted  
460 myotome patterns and clinical review of surgical outcomes when compared to data changes. Because wrist muscles were  
461 omitted, the observed rostral-caudal clustering of muscle activation is likely to be only partially reflective of the  
462 clustering of the circuitry of the spinal cord. Stimulation technique or study population may also be critical for the  
463 specific form of the observed clustering. In future studies these limitations may be addressed in alternative experimental  
464 settings either non-invasively or with implanted leads.

465 The map of muscle responses to cervical epidural stimulation can facilitate better understanding of spinal circuits and  
466 help target interventions. Stimulation of the cervical spinal cord may reveal patterns of activation, whether mediated by  
467 motor primitives or complex movements. In addition to single or short trains of stimuli, longer trains and/or multisite  
468 stimulation may help to reveal these motor programs. Multiple sites of stimulation may be needed to activate the desired  
469 circuit activation or movement. This map may be used to guide further experiments to elucidate optimal sites and  
470 stimulation patterns for activating movement and strengthening damaged spinal circuits.

## 471 **5 Data availability**

472 The data that support the findings of this study are available from the corresponding authors, upon reasonable request.  
473 Supplemental material is available at DOI: <https://doi.org/10.6084/m9.figshare.19891966>.

474

## 475 6 References

- 476 1. **Carhart MR, He J, Herman R, D’Luzansky S, Willis WT.** Epidural spinal-cord stimulation facilitates recovery  
477 of functional walking following incomplete spinal-cord injury. *IEEE Trans Neural Syst Rehabil Eng* 12: 32–42,  
478 2004. doi: 10.1109/TNSRE.2003.822763.
- 479 2. **Wagner FB, Mignardot J-B, Le Goff-Mignardot CG, Demesmaeker R, Komi S, Capogrosso M, Rowald A,**  
480 **Seáñez I, Caban M, Pirondini E, Vat M, McCracken LA, Heimgartner R, Fodor I, Watrin A, Seguin P,**  
481 **Paoles E, Van Den Keybus K, Eberle G, Schurch B, Pralong E, Becce F, Prior J, Buse N, Buschman R,**  
482 **Neufeld E, Kuster N, Carda S, von Zitzewitz J, Delattre V, Denison T, Lambert H, Minassian K, Bloch J,**  
483 **Courtine G.** Targeted neurotechnology restores walking in humans with spinal cord injury. *Nature* 563: 65–71,  
484 2018. doi: 10.1038/s41586-018-0649-2.
- 485 3. **Angeli CA, Boakye M, Morton RA, Vogt J, Benton K, Chen Y, Ferreira CK, Harkema SJ.** Recovery of Over-  
486 Ground Walking after Chronic Motor Complete Spinal Cord Injury. *N Engl J Med* 379: 1244–1250, 2018. doi:  
487 10.1056/NEJMoA1803588.
- 488 4. **Gill ML, Grahn PJ, Calvert JS, Linde MB, Lavrov IA, Strommen JA, Beck LA, Sayenko DG, Van Straaten**  
489 **MG, Drubach DI, Veith DD, Thoreson AR, Lopez C, Gerasimenko YP, Edgerton VR, Lee KH, Zhao KD.**  
490 Neuromodulation of lumbosacral spinal networks enables independent stepping after complete paraplegia. *Nat*  
491 *Med* 24: 1677–1682, 2018. doi: 10.1038/s41591-018-0175-7.
- 492 5. **Rowald A, Komi S, Demesmaeker R, Baaklini E, Hernandez-Charpak SD, Paoles E, Montanaro H, Cassara**  
493 **A, Becce F, Lloyd B, Newton T, Ravier J, Kinany N, D’Ercole M, Paley A, Hankov N, Varescon C,**  
494 **McCracken L, Vat M, Caban M, Watrin A, Jacquet C, Bole-Feysot L, Harte C, Lorach H, Galvez A,**  
495 **Tschopp M, Herrmann N, Wacker M, Geernaert L, Fodor I, Radevich V, Van Den Keybus K, Eberle G,**  
496 **Pralong E, Roulet M, Ledoux J-B, Fornari E, Mandija S, Mattera L, Martuzzi R, Nazarian B, Benkler S,**  
497 **Callegari S, Greiner N, Fuhrer B, Froeling M, Buse N, Denison T, Buschman R, Wende C, Ganty D, Bakker**  
498 **J, Delattre V, Lambert H, Minassian K, van den Berg CAT, Kavounoudias A, Micera S, Van De Ville D,**  
499 **Barraud Q, Kurt E, Kuster N, Neufeld E, Capogrosso M, Asboth L, Wagner FB, Bloch J, Courtine G.**  
500 Activity-dependent spinal cord neuromodulation rapidly restores trunk and leg motor functions after complete  
501 paralysis. *Nat Med* 28: 260–271, 2022. doi: 10.1038/s41591-021-01663-5.
- 502 6. **Dimitrijevic MR, Gerasimenko Y, Pinter MM.** Evidence for a spinal central pattern generator in humans. *Ann*  
503 *N Y Acad Sci* 860: 360–376, 1998. doi: 10.1111/j.1749-6632.1998.tb09062.x.
- 504 7. **Danner SM, Hofstoetter US, Freundl B, Binder H, Mayr W, Rattay F, Minassian K.** Human spinal locomotor  
505 control is based on flexibly organized burst generators. *Brain J Neurol* 138: 577–588, 2015. doi:  
506 10.1093/brain/awu372.
- 507 8. **Anderson KD.** Targeting Recovery: Priorities of the Spinal Cord-Injured Population. *J Neurotrauma* 21: 1371–  
508 1383, 2004. doi: 10.1089/neu.2004.21.1371.
- 509 9. **Snoek GJ, IJzerman MJ, Hermens HJ, Maxwell D, Biering-Sorensen F.** Survey of the needs of patients with  
510 spinal cord injury: impact and priority for improvement in hand function in tetraplegics. *Spinal Cord* 42: 526–532,  
511 2004. doi: 10.1038/sj.sc.3101638.
- 512 10. **Lu DC, Edgerton VR, Modaber M, AuYong N, Morikawa E, Zdurowski S, Sarino ME, Sarrafzadeh M,**  
513 **Nuwer MR, Roy RR, Gerasimenko Y.** Engaging Cervical Spinal Cord Networks to Reenable Volitional Control  
514 of Hand Function in Tetraplegic Patients. *Neurorehabil Neural Repair* 30: 951–962, 2016. doi:  
515 10.1177/1545968316644344.



- 516 11. **Freyvert Y, Yong NA, Morikawa E, Zdunowski S, Sarino ME, Gerasimenko Y, Edgerton VR, Lu DC.**  
517 Engaging cervical spinal circuitry with non-invasive spinal stimulation and buspirone to restore hand function in  
518 chronic motor complete patients. *Sci Rep* 8: 15546, 2018. doi: 10.1038/s41598-018-33123-5.
- 519 12. **Inanici F, Brighton LN, Samejima S, Hofstetter CP, Moritz CT.** Transcutaneous Spinal Cord Stimulation  
520 Restores Hand and Arm Function After Spinal Cord Injury. *IEEE Trans Neural Syst Rehabil Eng* 29: 310–319,  
521 2021. doi: 10.1109/TNSRE.2021.3049133.
- 522 13. **Kumru H, Flores Á, Rodríguez-Cañón M, Edgerton VR, García L, Benito-Penalva J, Navarro X,**  
523 **Gerasimenko Y, García-Alfás G, Vidal J.** Cervical Electrical Neuromodulation Effectively Enhances Hand  
524 Motor Output in Healthy Subjects by Engaging a Use-Dependent Intervention. *J Clin Med* 10: 195, 2021. doi:  
525 10.3390/jcm10020195.
- 526 14. **Pal A, Park H, Ramamurthy A, Asan AS, Bethea T, Johnkutty M, Carmel JB.** Spinal cord associative  
527 plasticity improves forelimb sensorimotor function after cervical injury. .
- 528 15. **Powell MP, Verma N, Sorensen E, Carranza E, Boos A, Fields D, Roy S, Ensel S, Barra B, Balzer J,**  
529 **Goldsmith J, Friedlander RM, Wittenberg G, Fisher LE, Krakauer JW, Gerszten PC, Pirondini E, Weber**  
530 **DJ, Capogrosso M.** Epidural stimulation of the cervical spinal cord improves voluntary motor control in post-  
531 stroke upper limb paresis. medRxiv: 2022.04.11.22273635, 2022.
- 532 16. **Dietz V.** Do human bipeds use quadrupedal coordination? *Trends Neurosci* 25: 462–467, 2002. doi:  
533 10.1016/S0166-2236(02)02229-4.
- 534 17. **Hofstoetter US, Freundl B, Binder H, Minassian K.** Common neural structures activated by epidural and  
535 transcutaneous lumbar spinal cord stimulation: Elicitation of posterior root-muscle reflexes. *PloS One* 13:  
536 e0192013, 2018. doi: 10.1371/journal.pone.0192013.
- 537 18. **Wu YK, Levine JM, Wecht JR, Maher MT, LiMonta JM, Saeed S, Santiago TM, Bailey E, Kastuar S, Guber**  
538 **KS, Yung L, Weir JP, Carmel JB, Harel NY.** Posteroanterior cervical transcutaneous spinal stimulation targets  
539 ventral and dorsal nerve roots. *Clin Neurophysiol* 131: 451–460, 2020. doi: 10.1016/j.clinph.2019.11.056.
- 540 19. **Renshaw B.** Activity in the simplest spinal reflex pathways. *J Neurophysiol* 3: 373–387, 1940. doi:  
541 10.1152/jn.1940.3.5.373.
- 542 20. **Lloyd DPC.** Reflex action in relation to pattern and peripheral source of afferent stimulation. *J Neurophysiol* 6:  
543 111–119, 1943.
- 544 21. **Rattay F, Minassian K, Dimitrijevic MR.** Epidural electrical stimulation of posterior structures of the human  
545 lumbosacral cord: 2. quantitative analysis by computer modeling. *Spinal Cord* 38: 473–489, 2000. doi:  
546 10.1038/sj.sc.3101039.
- 547 22. **Capogrosso M, Wenger N, Raspopovic S, Musienko P, Beauparlant J, Luciani LB, Courtine G, Micera S.**  
548 A computational model for epidural electrical stimulation of spinal sensorimotor circuits. *J Neurosci* 33: 19326–  
549 19340, 2013. doi: 10.1523/JNEUROSCI.1688-13.2013.
- 550 23. **Greiner N, Barra B, Schiavone G, Lorach H, James N, Conti S, Kaeser M, Fallegger F, Borgognon S, Lacour**  
551 **S, Bloch J, Courtine G, Capogrosso M.** Recruitment of upper-limb motoneurons with epidural electrical  
552 stimulation of the cervical spinal cord. *Nat Commun* 12: 435, 2021. doi: 10.1038/s41467-020-20703-1.
- 553 24. **Mishra AM, Pal A, Gupta D, Carmel JB.** Paired motor cortex and cervical epidural electrical stimulation timed  
554 to converge in the spinal cord promotes lasting increases in motor responses. *J Physiol* 595: 6953–6968, 2017. doi:  
555 10.1113/JP274663.

- 556 25. **Sharpe AN, Jackson A.** Upper-limb muscle responses to epidural, subdural and intraspinal stimulation of the  
557 cervical spinal cord. *J Neural Eng* 11: 016005, 2014. doi: 10.1088/1741-2560/11/1/016005.
- 558 26. **Jenny AB, Inukai J.** Principles of motor organization of the monkey cervical spinal cord. *J Neurosci* 3: 567–575,  
559 1983. doi: 10.1523/JNEUROSCI.03-03-00567.1983.
- 560 27. **Chiken S, Hatanaka N, Tokuno H.** Distribution of median, ulnar and radial motoneurons in the monkey spinal  
561 cord: a retrograde triple-labeling study. *Neurosci Lett* 307: 143–146, 2001. doi: 10.1016/s0304-3940(01)01918-8.
- 562 28. **Tubbs RS, El-Zammar D, Loukas M, Cömert A, Cohen-Gadol AA.** Intradural cervical root adjacent  
563 interconnections in the normal, prefixed, and postfixed brachial plexus: Laboratory investigation. *J Neurosurg*  
564 *Spine* 11: 413–416, 2009. doi: 10.3171/2009.4.SPINE09104.
- 565 29. **Atik AF, Calabrese E, Gramer R, Adil SM, Rahimpour S, Pagadala P, Johnson GA, Lad SP.** Structural  
566 mapping with fiber tractography of the human cuneate fasciculus at microscopic resolution in cervical region.  
567 *NeuroImage* 196: 200–206, 2019. doi: 10.1016/j.neuroimage.2019.04.030.
- 568 30. **Bollini CA, Wikinski JA.** Anatomical review of the brachial plexus. *Tech Reg Anesth Pain Manag* 10: 69–78,  
569 2006. doi: 10.1053/j.trap.2006.07.006.
- 570 31. **Schirmer CM, Shils JL, Arle JE, Cosgrove GR, Dempsey PK, Tarlov E, Kim S, Martin CJ, Feltz C, Moul  
571 M, Magge S.** Heuristic map of myotomal innervation in humans using direct intraoperative nerve root stimulation.  
572 *J Neurosurg Spine* 15: 64–70, 2011. doi: 10.3171/2011.2.SPINE1068.
- 573 32. **Dimitrijevic MR, Faganel J, Sharkey PC, Sherwood AM.** Study of sensation and muscle twitch responses to  
574 spinal cord stimulation. *Int Rehabil Med* 2: 76–81, 1980. doi: 10.3109/09638288009163961.
- 575 33. **Sabbahi MA, Uzun S, Ovak Bittar F, Sengul Y.** Similarities and differences in cervical and thoracolumbar  
576 multisegmental motor responses and the combined use for testing spinal circuitries. *J Spinal Cord Med* 37: 401–  
577 413, 2014. doi: 10.1179/2045772313Y.0000000157.
- 578 34. **Yonemura H, Kaneko K, Taguchi T, Fujimoto H, Toyoda K, Kawai S.** Nerve root distribution of deltoid and  
579 biceps brachii muscle in cervical spondylotic myelopathy: a potential risk factor for postoperative shoulder muscle  
580 weakness after posterior decompression. *J Orthop Sci* 9: 540–544, 2004. doi: 10.1007/s00776-004-0832-1.
- 581 35. **Brendler SJ.** The Human Cervical Myotomes: Functional Anatomy Studied at Operation. *J Neurosurg* 28: 105–  
582 111, 1968. doi: 10.3171/jns.1968.28.2.0105.
- 583 36. **Moritz CT, Lucas TH, Perlmutter SI, Fetz EE.** Forelimb Movements and Muscle Responses Evoked by  
584 Microstimulation of Cervical Spinal Cord in Sedated Monkeys. *J Neurophysiol* 97: 110–120, 2007. doi:  
585 10.1152/jn.00414.2006.
- 586 37. **Borckardt JJ, Nahas Z, Koola J, George MS.** Estimating resting motor thresholds in transcranial magnetic  
587 stimulation research and practice: a computer simulation evaluation of best methods. *J ECT* 22: 169–175, 2006.  
588 doi: 10.1097/01.yct.0000235923.52741.72.
- 589 38. **Friedman J, Hastie T, Tibshirani R, others.** *The elements of statistical learning*. Springer series in statistics New  
590 York, 2001.
- 591 39. **Biabani M, Fornito A, Coxon JP, Fulcher BD, Rogasch NC.** The correspondence between EMG and EEG  
592 measures of changes in cortical excitability following transcranial magnetic stimulation. *J Physiol* 599: 2907–  
593 2932, 2021. doi: 10.1113/JP280966.



- 594 40. **Sharma P, Shah PK.** In vivo electrophysiological mechanisms underlying cervical epidural stimulation in adult  
595 rats. *J Physiol* 599: 3121–3150, 2021. doi: 10.1113/JP281146.
- 596 41. **Ko H-Y, Park JH, Shin YB, Baek SY.** Gross quantitative measurements of spinal cord segments in human. *Spinal*  
597 *Cord* 42: 35–40, 2004. doi: 10.1038/sj.sc.3101538.
- 598 42. **Islam MdA, Zaaya M, Comiskey E, Demetrio J, O’Keefe A, Palazzo N, Pulverenti TS, Knikou M.** Modulation  
599 of soleus H-reflex excitability following cervical transspinal conditioning stimulation in humans. *Neurosci Lett*  
600 732: 135052, 2020. doi: 10.1016/j.neulet.2020.135052.
- 601 43. **Sunshine MD, Cho FS, Lockwood DR, Fechko AS, Kasten MR, Moritz CT.** Cervical intraspinal  
602 microstimulation evokes robust forelimb movements before and after injury. *J Neural Eng* 10: 036001, 2013. doi:  
603 10.1088/1741-2560/10/3/036001.
- 604 44. **Kato K, Nishihara Y, Nishimura Y.** Stimulus outputs induced by subdural electrodes on the cervical spinal cord  
605 in monkeys. *J Neural Eng* 17: 016044, 2020. doi: 10.1088/1741-2552/ab63a3.
- 606 45. **Lamotte C.** Distribution of the tract of lissauer and the dorsal root fibers in the primate spinal cord. *J Comp Neurol*  
607 172: 529–561, 1977. doi: 10.1002/cne.901720308.
- 608 46. **Pierrot-Deseilligny E.** Propriospinal transmission of part of the corticospinal excitation in humans. *Muscle Nerve*  
609 26: 155–172, 2002. doi: 10.1002/mus.1240.
- 610 47. **Zehr EP, Duysens J.** Regulation of arm and leg movement during human locomotion. *Neurosci Rev J Bringing*  
611 *Neurobiol Neurol Psychiatry* 10: 347–361, 2004. doi: 10.1177/1073858404264680.
- 612 48. **Ferris DP, Huang HJ, Kao P-C.** Moving the arms to activate the legs. *Exerc Sport Sci Rev* 34: 113–120, 2006.  
613 doi: 10.1249/00003677-200607000-00005.
- 614 49. **Balter JE, Zehr EP.** Neural Coupling Between the Arms and Legs During Rhythmic Locomotor-Like Cycling  
615 Movement. *J Neurophysiol* 97: 1809–1818, 2007. doi: 10.1152/jn.01038.2006.
- 616 50. **Masugi Y, Sasaki A, Kaneko N, Nakazawa K.** Remote muscle contraction enhances spinal reflexes in multiple  
617 lower-limb muscles elicited by transcutaneous spinal cord stimulation. *Exp Brain Res* 237: 1793–1803, 2019. doi:  
618 10.1007/s00221-019-05536-9.
- 619 51. **Barra B, Conti S, Perich MG, Zhuang K, Schiavone G, Fallegger F, Galan K, James ND, Barraud Q,**  
620 **Delacombaz M, Kaeser M, Rouiller EM, Milekovic T, Lacour S, Bloch J, Courtine G, Capogrosso M.**  
621 Epidural Electrical Stimulation of the Cervical Dorsal Roots Restores Voluntary Upper Limb Control in Paralyzed  
622 Monkeys. .
- 623 52. **Marsden CD, Merton PA, Morton HB.** Human postural responses. *Brain J Neurol* 104: 513–534, 1981. doi:  
624 10.1093/brain/104.3.513.
- 625 53. **Knikou M.** Effects of changes in hip position on actions of spinal inhibitory interneurons in humans. *Int J Neurosci*  
626 116: 945–961, 2006. doi: 10.1080/00207450600675167.
- 627 54. **Knikou M, Angeli CA, Ferreira CK, Harkema SJ.** Soleus H-Reflex Gain, Threshold, and Amplitude as  
628 Function of Body Posture and Load in Spinal Cord Intact and Injured Subjects. *Int J Neurosci* 119: 2056–2073,  
629 2009. doi: 10.1080/00207450903139747.
- 630 55. **Danner SM, Krenn M, Hofstoetter US, Toth A, Mayr W, Minassian K.** Body Position Influences Which Neural  
631 Structures Are Recruited by Lumbar Transcutaneous Spinal Cord Stimulation. *PloS One* 11: e0147479, 2016. doi:  
632 10.1371/journal.pone.0147479.
